# Supplementary material for: Ultrafast dynamics of a molecular rotor in chemical and biological nano-cavities
Source: Royal Society of Chemistry journal article supplement (doi:10.1039/c5ra13298c), 2015-01-01
Supplement: c5ra13298c1.pdf [file c5ra13298c1.pdf]

## Supporting Information

# **Ultrafast Dynamics of a Molecular Rotor in Chemical and Biological Nano-Cavities**

Krishna Gavvala, Sagar Satpathi, Partha Hazra\*

Department of Chemistry, Indian Institute of Science Education and Research (IISER), Pune  
411008, Maharashtra, India.

---

\* Corresponding author. E-mail: [p.hazra@iiserpune.ac.in](mailto:p.hazra@iiserpune.ac.in). Tel.: +91-20-2590-8077; Fax: +91-20-2589 9790.

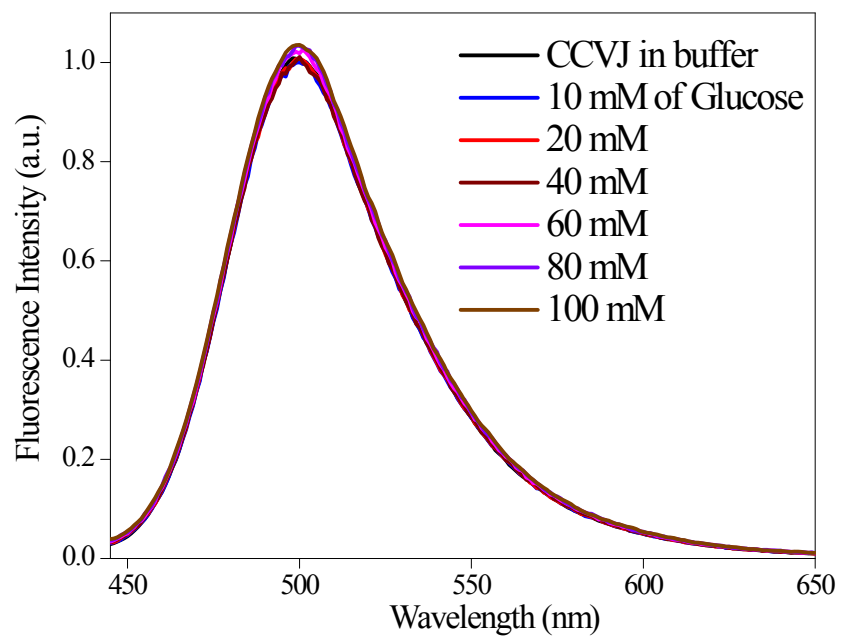

**Figure S1.** Emission spectra ( $\lambda_{\text{ex}} = 430 \text{ nm}$ ) of CCVJ ( $10 \mu\text{M}$ ) in presence of various concentration of glucose.

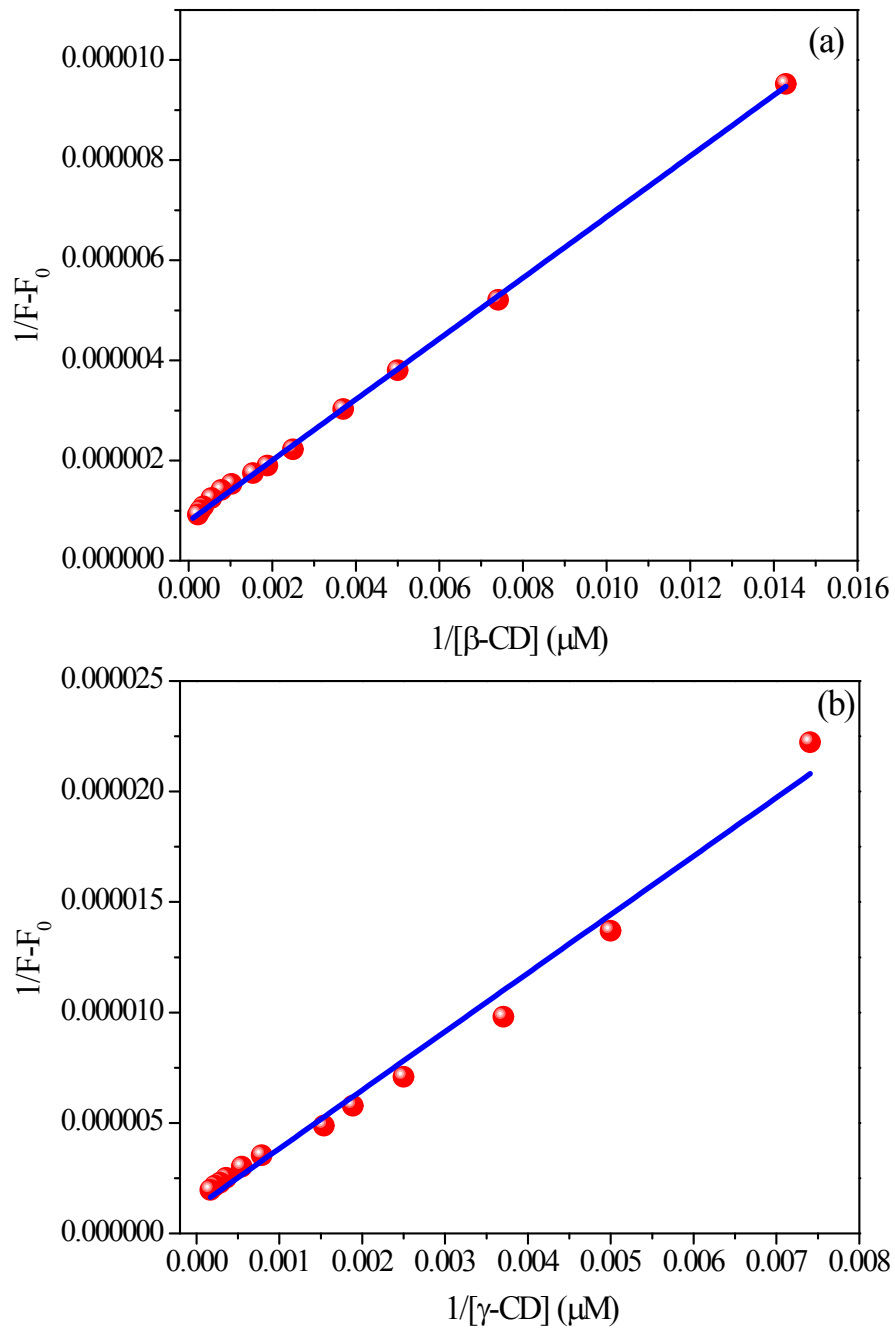

**Figure S2.** Benesi-Hildebrand plot for complexation of CCVJ with  $\beta$ -CD (a) and  $\gamma$ -CD (b).

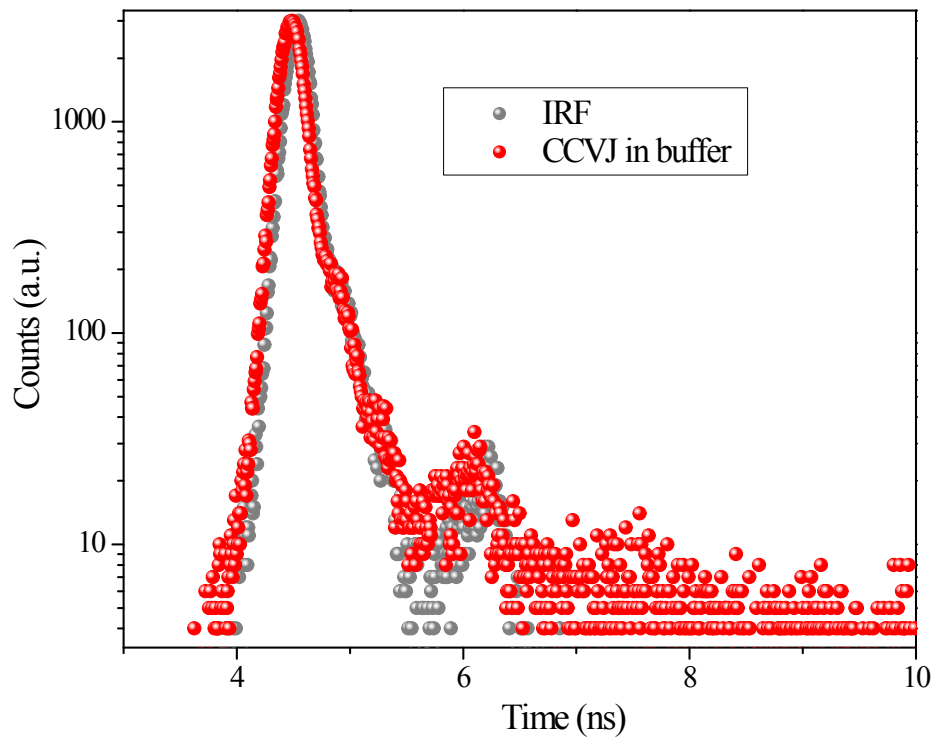

**Figure S3.** Fluorescence decay transient of CCVJ in buffer using TCSPC set-up. Instrument response profile is shown in grey color. Excitation wavelength is 440 nm.

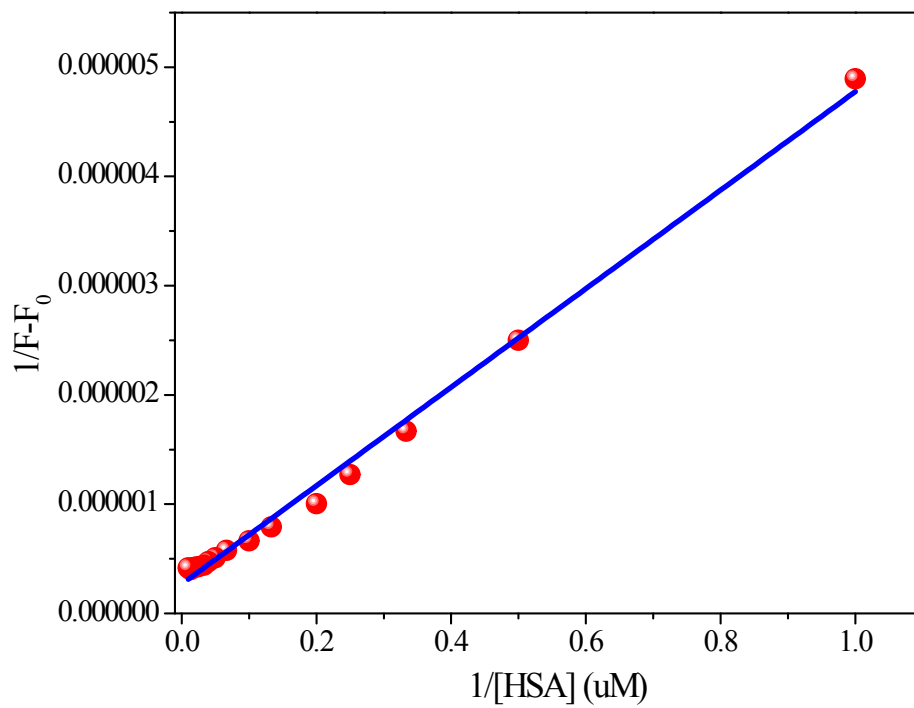

**Figure S4.** Benesi-Hildebrand plot for the complexation of CCVJ with HSA protein.
